# Supplementary material for: Hydrophobin-Coated Perfluorocarbon Microbubbles with Strong Non-Linear Acoustic Response
Source: MDPI journal article supplement (doi:10.3390/chemistry6020016), 2024-03-26
Supplement: s1 [file s1]

## Supporting Information

# **Hydrophobin-coated perfluorocarbon microbubbles with strong non-linear acoustic response**

1 Department of Chemistry, Materials & Chemical Engineering “Giulio Natta”,  
Politecnico di Milano, Via L. Mancinelli 7, 20131 Milano, Italy;  
valentina.dichiarante@polimi.it (V.D.); giusisalzano@gmail.com (G.S.)

2 Bracco Suisse SA, Route de la Galaise 31, 1228 Plan-les-Ouates,  
Switzerland; philippe.bussat@bracco.com (P.B.); emmanuel.gaud@bracco.com  
(E.G.); samir.cherkaoui@bracco.com (S.C.)

\* Correspondence: pierangelo.metrangolo@polimi.it

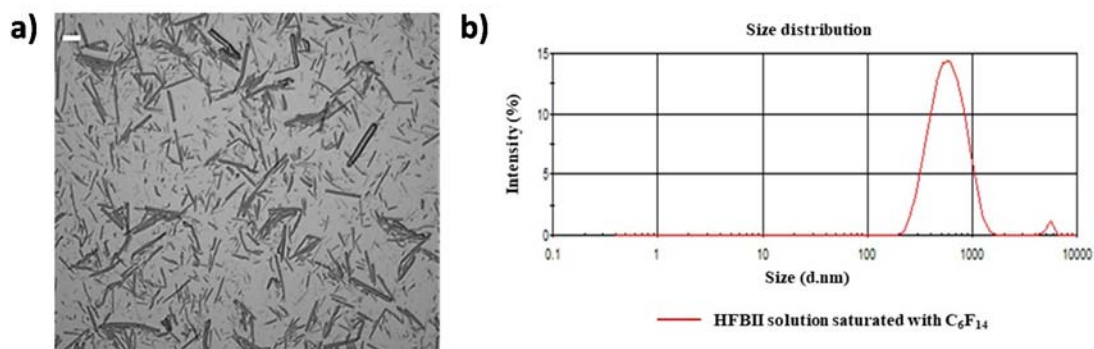

**Figure S1.** Effect of  $C_6F_{14}$ -saturated atmosphere on the dissolution of HFBII in water. (a) Optical microscope image of a HFBII solution in water prepared without  $C_6F_{14}$ -saturation (scale bar 20  $\mu m$ ). (b) DLS size distribution analysis of an aqueous HFBII solution obtained under a  $C_6F_{14}$ -saturated atmosphere.

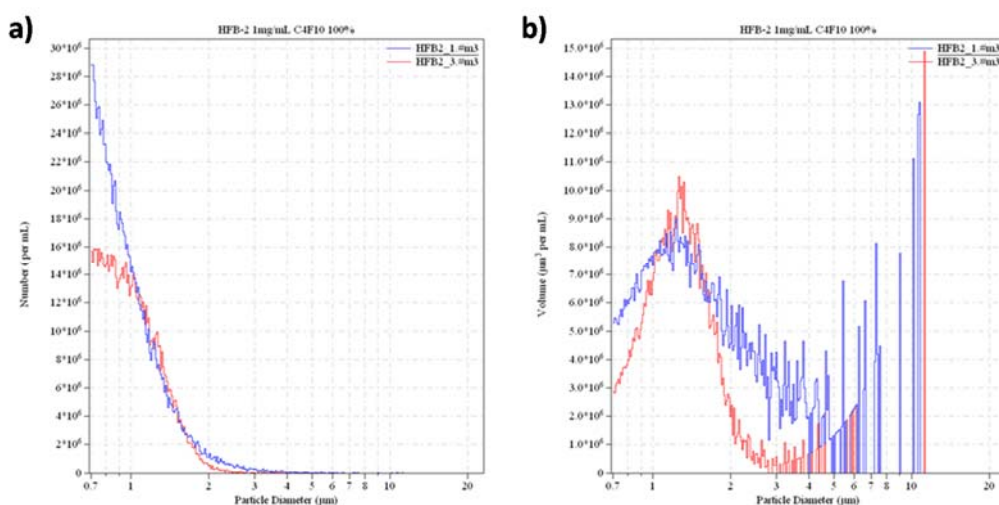

**Figure S2.** Size distribution analysis of  $C_4F_{10}$ -filled HFBII-MBs at different times after production. (a) Number-weighted size distribution at  $t_0$  (blue) and  $t_0+18h$  (red); (b) Volume-weighted size distribution at  $t_0$  (blue) and  $t_0+18h$  (red). Data obtained by Coulter Counter analysis.
